# Supplementary material
Source: PubMed Central journal article supplement (PMC6696970)
Supplement: AEM.01180-19-s0002.pdf [file AEM.01180-19-s0002.pdf]

Supplementary Materials FOR PUBLICATION

1  
2  
3  
4  
5  
6  
7  
8  
9  
10  
11  
12  
13  
14  
15  
16  
17  
18  
19  
20  
21  
22

**Table S1:** A list of the soil and site characteristics for each of the 143 soil samples. This table also contains 16s rRNA and hsp65 amplicon read counts per sample, and the percent relative abundance of reads assigned to the *Mycobacterium* genus as determined by the 16S rRNA gene analyses. Abbreviations are as follows: *Clay* = *Clay+Silt (%)*; *OC* = *Organic carbon (%)*; *TN* = *Total nitrogen (%)*; *TPmgKg*=*Total phosphorus (mg P Kg)*; *CN* = *Carbon:Nitrogen ratio*; *pHwater* = *pH*; *AridityIndex* = *Aridity Index*; *MDR* = *Mean diurnal temperature range (°C)*; *MAXT* = *Maximum temperature (°C)*; *MINT* = *Minimum temperature (°C)*; *PSEA* = *Precipitation seasonality*; *UV=UV light*; *NPP20032015* = *Net primary productivity (NDVI index)*; *Ecosystem* = *Ecosystem type*; *ElectricalConductivityuScm* = *Electrical conductivity (μS cm)*; *Myco\_16S\_relabun* = *mycobacteria relative abundance*; *16S\_reads* = *16S reads (pre-ordination)*; *hsp65\_reads* = *hsp65 reads (pre presence/absence category)*.

**(separate attachment)**

23 **Table S2:** A table of Pearson correlations between pairs of each environmental variable  
 24 measured. For abbreviation definitions, see Table S1.

|    | Var1        | Var2         | Correlation |     | Var1        | Var2         | Correlation |
|----|-------------|--------------|-------------|-----|-------------|--------------|-------------|
| 1  | TN          | OC           | 0.8131      | 52  | UV          | Altitude     | 0.1781      |
| 2  | MINT        | UV           | 0.8062      | 53  | MAXT        | PSEA         | -0.1640     |
| 3  | NPP20032015 | AridityIndex | 0.7842      | 54  | Clay        | AridityIndex | 0.1626      |
| 4  | NPP20032015 | pHwater      | -0.7249     | 55  | PSEA        | MINT         | -0.1615     |
| 5  | pHwater     | AridityIndex | -0.7066     | 56  | MINT        | Altitude     | -0.1606     |
| 6  | TN          | ECuScm       | 0.6770      | 57  | PSEA        | ECuScm       | -0.1566     |
| 7  | OC          | ECuScm       | 0.6355      | 58  | TN          | Altitude     | 0.1556      |
| 8  | Latitude    | UV           | -0.5940     | 59  | OC          | Altitude     | 0.1556      |
| 9  | MAXT        | pHwater      | 0.5767      | 60  | UV          | AridityIndex | 0.1394      |
| 10 | Latitude    | MINT         | -0.5623     | 61  | MINT        | AridityIndex | 0.1380      |
| 11 | NPP20032015 | TN           | 0.5297      | 62  | Longitude   | CN           | -0.1379     |
| 12 | NPP20032015 | OC           | 0.4927      | 63  | CN          | MINT         | -0.1373     |
| 13 | TN          | AridityIndex | 0.4701      | 64  | Latitude    | TN           | 0.1352      |
| 14 | NPP20032015 | ECuScm       | 0.4625      | 65  | Longitude   | PSEA         | 0.1252      |
| 15 | pHwater     | OC           | -0.4571     | 66  | PSEA        | OC           | -0.1230     |
| 16 | ECuScm      | AridityIndex | 0.4536      | 67  | MINT        | pHwater      | 0.1190      |
| 17 | OC          | AridityIndex | 0.4447      | 68  | Longitude   | Clay         | -0.1188     |
| 18 | MAXT        | AridityIndex | -0.4263     | 69  | Longitude   | MINT         | 0.1179      |
| 19 | pHwater     | TN           | -0.4148     | 70  | pHwater     | Clay         | -0.1168     |
| 20 | CN          | pHwater      | -0.4033     | 71  | Latitude    | Clay         | 0.1135      |
| 21 | CN          | OC           | 0.4024      | 72  | OC          | Clay         | 0.1075      |
| 22 | Longitude   | Latitude     | -0.3856     | 73  | CN          | UV           | -0.1074     |
| 23 | MAXT        | TN           | -0.3833     | 74  | TN          | Clay         | 0.1074      |
| 24 | MAXT        | MINT         | 0.3712      | 75  | PSEA        | Altitude     | -0.1047     |
| 25 | MAXT        | OC           | -0.3711     | 76  | NPP20032015 | Altitude     | -0.1021     |
| 26 | CN          | NPP20032015  | 0.3401      | 77  | Latitude    | pHwater      | 0.0988      |
| 27 | Longitude   | AridityIndex | -0.3340     | 78  | pHwater     | Altitude     | 0.0980      |
| 28 | PSEA        | NPP20032015  | -0.3283     | 79  | PSEA        | TN           | -0.0973     |
| 29 | Longitude   | NPP20032015  | -0.3268     | 80  | Latitude    | NPP20032015  | -0.0957     |
| 30 | MAXT        | NPP20032015  | -0.3247     | 81  | Latitude    | AridityIndex | 0.0874      |
| 31 | Longitude   | ECuScm       | -0.3228     | 82  | Latitude    | OC           | 0.0842      |
| 32 | Longitude   | Altitude     | -0.3226     | 83  | ECuScm      | Altitude     | 0.0788      |
| 33 | pHwater     | ECuScm       | -0.3141     | 84  | CN          | Clay         | 0.0745      |
| 34 | Longitude   | MAXT         | 0.2877      | 85  | MINT        | OC           | -0.0742     |
| 35 | MAXT        | Altitude     | -0.2739     | 86  | Altitude    | AridityIndex | -0.0699     |
| 36 | Longitude   | TN           | -0.2620     | 87  | PSEA        | pHwater      | 0.0585      |
| 37 | MAXT        | ECuScm       | -0.2552     | 88  | CN          | TN           | 0.0576      |
| 38 | CN          | AridityIndex | 0.2521      | 89  | MINT        | ECuScm       | -0.0527     |
| 39 | Longitude   | OC           | -0.2431     | 90  | MINT        | TN           | -0.0516     |
| 40 | NPP20032015 | Clay         | 0.2399      | 91  | Latitude    | PSEA         | -0.0514     |
| 41 | Longitude   | pHwater      | 0.2380      | 92  | Latitude    | MAXT         | -0.0505     |
| 42 | UV          | NPP20032015  | 0.2246      | 93  | Latitude    | CN           | 0.0501      |
| 43 | PSEA        | AridityIndex | -0.2222     | 94  | UV          | Clay         | -0.0444     |
| 44 | MAXT        | UV           | 0.2108      | 95  | CN          | Altitude     | 0.0388      |
| 45 | CN          | PSEA         | -0.2100     | 96  | PSEA        | UV           | 0.0370      |
| 46 | Latitude    | Altitude     | 0.2042      | 97  | Longitude   | UV           | -0.0354     |
| 47 | ECuScm      | Clay         | 0.2010      | 98  | UV          | ECuScm       | -0.0291     |
| 48 | MAXT        | CN           | -0.1953     | 99  | MINT        | Clay         | 0.0189      |
| 49 | Altitude    | Clay         | -0.1925     | 100 | UV          | TN           | -0.0183     |
| 50 | Latitude    | ECuScm       | 0.1887      | 101 | UV          | OC           | -0.0155     |
| 51 | MINT        | NPP20032015  | 0.1884      | 102 | PSEA        | Clay         | 0.0139      |
| 52 | CN          | ECuScm       | 0.1798      | 103 | UV          | pHwater      | -0.0090     |
|    |             |              |             | 104 | MAXT        | Clay         | -0.0076     |

26 **Table S3:** Output of Random Forest Models identifying environmental variables important for  
27 predicting distributions of the *Mycobacterium* genus as well as the top 20 most ubiquitous  
28 mycobacterial lineages. The table includes the percent variation described by the model overall  
29 as well as the importance of the top 4 environmental predictors. For abbreviation definitions,  
30 see Table S1. Four of these mycobacterial clades included described members: **Clade 10** (*M.*  
31 *stomatepiae* DSM 45059 T, *M. genavense* DSM 44424 T, *M. florentinum* DSM 44852 T, *M.*  
32 *lentiflavum* CIP 105465 T, *M. montefiorensis* DSM 44602 ATC, *M. triplex* ATCC 700071 CIP 106) ;  
33 **Clade 12** (*M. novocastrensis* CIP 105546 T, *M. rutilum* czh-117 T); **Clade 31** (*M. arosiense* DSM  
34 45069 T1921 A, *M. intracellulare* ATCC 13950 T, *M. yongonense* 05-1390 T, *M. avium* subsp.  
35 *paratuberculosis*, *M. bouchedurhonense* CIP 109827, *M. avium* subsp. *silvaticum* ATC, *M.*  
36 *colombiense* CIP 108962 T, *M. chimaera* CIP 107892, *M. timonense* CIP 109830 T, *M. vulneris*  
37 *NLA000700772* T, *M. marseillense* 5356591 CIP 10, *M. avium* subsp. *avium* ATCC 252), and  
38 **Clade 44** (*M. doricum* DSM 44339 T, *M. monacense* DSM 44395 T).

39

| Group Modeled    | % Variation Explained | Predictor 1    | Percent Explained | p value | Predictor 2    | Percent Explained | p value | Predictor 3    | Percent Explained | p value | Predictor 4  | Percent Explained | p value |
|------------------|-----------------------|----------------|-------------------|---------|----------------|-------------------|---------|----------------|-------------------|---------|--------------|-------------------|---------|
| 16s Mycobacteria | 25                    | MINT           | 31                | ****    | MAXT           | 18                | *       | pHwater        | 15                | *       | AridityIndex | 16                | NS      |
| clade 5          | 61                    | AridityIndex   | 35                | ****    | MAXT           | 25                | **      | MINT           | 24                | **      | pHwater      | 20                | *       |
| clade 69         | 55                    | pHwater        | 33                | ****    | AridityIndex   | 25                | **      | MINT           | 18                | **      | CN           | 12                | NS      |
| clade 29         | 50                    | AridityIndex   | 31                | ****    | MINT           | 24                | **      | ElectricalCond | 22                | **      | OC           | 16                | NS      |
| clade 10         | 43                    | AridityIndex   | 34                | ****    | MINT           | 27                | **      | pHwater        | 23                | **      | MAXT         | 15                | NS      |
| clade 9          | 39                    | pHwater        | 15                | NS      | CN             | 11                | NS      | ElectricalCond | 10                | *       | MINT         | 8                 | NS      |
| clade 15         | 38                    | MINT           | 25                | **      | AridityIndex   | 23                | **      | pHwater        | 21                | *       | OC           | 14                | NS      |
| clade 24         | 33                    | MAXT           | 31                | ***     | AridityIndex   | 25                | **      | MINT           | 21                | **      | pHwater      | 17                | *       |
| clade 1          | 30                    | MAXT           | 27                | ***     | ElectricalCond | 16                | *       | pHwater        | 12                | *       | AridityIndex | 12                | NS      |
| clade 12         | 29                    | pHwater        | 40                | ****    | MAXT           | 22                | **      | AridityIndex   | 21                | ****    | MINT         | 21                | **      |
| clade 23         | 23                    | pHwater        | 24                | **      | AridityIndex   | 19                | *       | OC             | 18                | *       | MINT         | 17                | *       |
| clade 38         | 22                    | AridityIndex   | 19                | *       | MAXT           | 18                | *       | OC             | 18                | NS      | pHwater      | 14                | NS      |
| clade 21         | 22                    | AridityIndex   | 19                | *       | MAXT           | 17                | *       | MINT           | 14                | *       | pHwater      | 13                | NS      |
| clade 46         | 29                    | AridityIndex   | 19                | *       | pHwater        | 17                | *       | MINT           | 14                | *       | OC           | 12                | NS      |
| clade 13         | 14                    | pHwater        | 20                | *       | OC             | 19                | *       | AridityIndex   | 9                 | NS      | MINT         | 7                 | NS      |
| clade 44         | 3                     | ElectricalCond | 14                | NS      | pHwater        | 12                | NS      | AridityIndex   | 11                | NS      | MAXT         | 6                 | NS      |
| clade 3          | 2                     | pHwater        | 14                | NS      | AridityIndex   | 11                | NS      | OC             | 6                 | NS      | MAXT         | 5                 | NS      |
| clade 31         | -4                    | pHwater        | 10                | NS      | AridityIndex   | 10                | NS      | CN             | 5                 | NS      | MINT         | 1                 | NS      |
| clade 54         | -17                   | MAXT           | 14                | NS      | OC             | 13                | NS      | AridityIndex   | 12                | NS      | MINT         | 8                 | NS      |
| clade 74         | -13                   | MAXT           | 12                | NS      | AridityIndex   | 12                | NS      | OC             | 12                | NS      | pHwater      | 11                | NS      |
| clade 45         | -8                    | pHwater        | 17                | *       | AridityIndex   | 15                | NS      | MAXT           | 11                | NS      | Clay         | 8                 | NS      |
| p < 0.0001       | ****                  |                |                   |         |                |                   |         |                |                   |         |              |                   |         |
| p < 0.001        | ***                   |                |                   |         |                |                   |         |                |                   |         |              |                   |         |
| p < 0.01         | **                    |                |                   |         |                |                   |         |                |                   |         |              |                   |         |
| p < 0.05         | *                     |                |                   |         |                |                   |         |                |                   |         |              |                   |         |
| p > 0.05         | NS                    |                |                   |         |                |                   |         |                |                   |         |              |                   |         |

40

41

42

43

44

45

46

47

48

49

50

51

52

53 **Table S4:** Summary of the statistical tests performed on mycobacterial clade presence and  
 54 absence in different environmental conditions. Results of Spearman correlations and Wilcoxon  
 55 rank-sum tests are included for the twenty most ubiquitous clades. Four of these mycobacterial  
 56 clades included described members: Clade 10, Clade 12, Clade 31, Clade 44 (for detailed list of  
 57 named species see Table S3).

| Clade    | soil pH     |          |                         |          | Aridity Index |          |                         |          | Minimum Annual Temperature |          |                           |          |
|----------|-------------|----------|-------------------------|----------|---------------|----------|-------------------------|----------|----------------------------|----------|---------------------------|----------|
|          | pH Wilcoxon |          | pH Spearman Correlation |          | AI Wilcoxon   |          | AI Spearman Correlation |          | MINT Wilcoxon              |          | MINT Spearman Correlation |          |
|          | W           | pval     | spm R                   | spm pval | W             | pval     | spm R                   | spm pval | W                          | pval     | spm R                     | spm pval |
| Clade 1  | 1352        | 0.037348 | -0.17                   | 0.037    | 620.5         | 0.010398 | 0.21                    | 0.010    | 1229.5                     | 0.192412 | -0.11                     | 0.192    |
| Clade 3  | 839.5       | 0.418773 | -0.07                   | 0.419    | 461           | 0.042245 | 0.17                    | 0.041    | 1174.5                     | 0.000872 | -0.28                     | 0.001    |
| Clade 5  | 2780        | 5.45E-09 | -0.49                   | 0.000    | 527.5         | 3.14E-08 | 0.46                    | 0.000    | 2522                       | 5.86E-06 | -0.38                     | 0.000    |
| Clade 9  | 1140        | 0.000224 | -0.31                   | 0.000    | 221           | 0.000423 | 0.30                    | 0.000    | 1066                       | 0.001878 | -0.26                     | 0.002    |
| Clade 10 | 2471        | 3.31E-08 | -0.46                   | 0.000    | 518           | 7.78E-07 | 0.41                    | 0.000    | 969                        | 0.011643 | 0.21                      | 0.011    |
| Clade 12 | 729.5       | 8.85E-13 | 0.60                    | 0.000    | 3687          | 8.15E-07 | -0.41                   | 0.000    | 2259                       | 0.368674 | 0.08                      | 0.369    |
| Clade 13 | 212         | 2.80E-05 | 0.35                    | 0.000    | 1044          | 0.069028 | -0.15                   | 0.068    | 574                        | 0.11583  | 0.13                      | 0.115    |
| Clade 15 | 2043.5      | 0.017671 | -0.20                   | 0.017    | 820           | 0.000102 | 0.33                    | 0.000    | 2573                       | 3.70E-07 | -0.43                     | 0.000    |
| Clade 21 | 1457.5      | 2.43E-05 | -0.35                   | 0.000    | 205           | 6.66E-06 | 0.38                    | 0.000    | 565                        | 0.046128 | 0.17                      | 0.045    |
| Clade 23 | 2213        | 0.04331  | -0.17                   | 0.043    | 1166.5        | 0.002665 | 0.25                    | 0.002    | 2778                       | 2.17E-06 | -0.40                     | 0.000    |
| Clade 24 | 2710.5      | 2.97E-05 | -0.35                   | 0.000    | 1031.5        | 0.000144 | 0.32                    | 0.000    | 2416                       | 0.005494 | -0.23                     | 0.005    |
| Clade 29 | 2590        | 0.000713 | -0.28                   | 0.001    | 765.5         | 2.06E-07 | 0.43                    | 0.000    | 3115.5                     | 4.69E-09 | -0.49                     | 0.000    |
| Clade 31 | 6900        | 2.26E-12 | -0.41                   | 0.000    | 1176          | 4.38E-10 | 0.37                    | 0.000    | 2824                       | 0.015427 | 0.14                      | 0.087    |
| Clade 38 | 751.5       | 0.524397 | -0.05                   | 0.524    | 398.5         | 0.03316  | 0.18                    | 0.032    | 1071.5                     | 0.001621 | -0.26                     | 0.001    |
| Clade 44 | 559.5       | 3.46E-05 | 0.35                    | 0.000    | 1994.5        | 6.97E-05 | -0.33                   | 0.000    | 1052                       | 0.176003 | 0.11                      | 0.176    |
| Clade 45 | 984         | 0.001914 | -0.26                   | 0.002    | 276           | 0.006289 | 0.23                    | 0.006    | 560.5                      | 0.701078 | 0.03                      | 0.699    |
| Clade 46 | 1166.5      | 0.001083 | -0.27                   | 0.001    | 257           | 0.000363 | 0.30                    | 0.000    | 1005.5                     | 0.039634 | -0.17                     | 0.039    |
| Clade 54 | 640         | 0.069159 | 0.15                    | 0.068    | 941           | 0.837018 | -0.02                   | 0.835    | 1145.5                     | 0.112952 | -0.13                     | 0.112    |
| Clade 69 | 1835.5      | 2.53E-07 | -0.43                   | 0.000    | 384.5         | 4.85E-05 | 0.34                    | 0.000    | 1475                       | 0.004177 | -0.24                     | 0.004    |
| Clade 74 | 880         | 0.265635 | -0.09                   | 0.265    | 406.5         | 0.014643 | 0.20                    | 0.014    | 1105                       | 0.005015 | -0.23                     | 0.005    |

58

59

60

61

62

63

64

65

66

67

68 **Table S5:** Summary of the Spearman partial correlations tests performed to determine the  
69 relationship between mycobacterial clade presence/absence and latitude and longitude while  
70 controlling for the effect of predictive environmental variables. Also included is the same test to  
71 determine the relationship between mycobacterial clade presence/absence and environmental  
72 variables while controlling for the effect of latitude and longitude. Matrix results of Spearman  
73 partial correlations are included for the clades represented in Figure 4. Four of these  
74 mycobacterial clades included described members: Clade 10, Clade 12, Clade 31, Clade 44 (for  
75 detailed list of named species see Table S3).

76

| Clade 12       |          |       |                |                | pH          |                |         |       |                | Clade 69       |          |                |          |       |                |                |          |
|----------------|----------|-------|----------------|----------------|-------------|----------------|---------|-------|----------------|----------------|----------|----------------|----------|-------|----------------|----------------|----------|
| Rs Estimate    |          |       |                |                | Rs Estimate |                |         |       |                | Rs Estimate    |          |                |          |       |                |                |          |
| clade_12       | clade_12 | pH    | Longitude(sin) | Longitude(cos) | Latitude    | clade_5        | clade_5 | pH    | Longitude(sin) | Longitude(cos) | Latitude | clade_69       | clade_69 | pH    | Longitude(sin) | Longitude(cos) | Latitude |
| clade_12       | 1.00     | 0.59  | -0.02          | -0.02          | 0.17        | clade_5        | 1.00    | -0.44 | 0.14           | -0.04          | 0.36     | clade_69       | 1.00     | -0.37 | 0.13           | 0.06           | 0.18     |
| pH             | 0.59     | 1.00  | 0.39           | -0.12          | -0.22       | pH             | -0.44   | 1.00  | -0.16          | -0.17          | 0.03     | pH             | -0.37    | 1.00  | -0.19          | -0.13          | -0.07    |
| Longitude(sin) | -0.02    | -0.19 | 1.00           | -0.09          | 0.13        | Longitude(sin) | 0.14    | -0.16 | 1.00           | -0.09          | 0.07     | Longitude(sin) | 0.13     | -0.19 | 1.00           | -0.10          | 0.10     |
| Longitude(cos) | -0.02    | -0.12 | -0.09          | 1.00           | -0.21       | Longitude(cos) | -0.04   | -0.17 | -0.09          | 1.00           | -0.19    | Longitude(cos) | 0.06     | -0.13 | -0.10          | 1.00           | -0.23    |
| Latitude       | 0.17     | -0.22 | 0.13           | -0.21          | 1.00        | Latitude       | 0.36    | 0.03  | 0.07           | -0.19          | 1.00     | Latitude       | 0.18     | -0.07 | 0.10           | -0.23          | 1.00     |
| p value        |          |       |                |                | p value     |                |         |       |                | p value        |          |                |          |       |                |                |          |
| clade_12       | 0.000    | 0.00  | 0.824          | 0.782          | 0.045       | clade_5        | 0.00    | 0.00  | 0.09           | 0.62           | 0.00     | clade_69       | 0.00     | 0.00  | 0.12           | 0.48           | 0.04     |
| pH             | 0.000    | 1.00  | 0.021          | 0.163          | 0.010       | pH             | 0.00    | 0.00  | 0.05           | 0.05           | 0.69     | pH             | 0.00     | 0.00  | 0.03           | 0.12           | 0.42     |
| Longitude(sin) | 0.824    | 0.02  | 0.000          | 0.276          | 0.125       | Longitude(sin) | 0.09    | 0.05  | 0.00           | 0.32           | 0.43     | Longitude(sin) | 0.12     | 0.03  | 0.00           | 0.24           | 0.23     |
| Longitude(cos) | 0.782    | 0.16  | 0.276          | 0.000          | 0.011       | Longitude(cos) | 0.62    | 0.05  | 0.32           | 0.00           | 0.02     | Longitude(cos) | 0.48     | 0.12  | 0.24           | 0.00           | 0.01     |
| Latitude       | 0.045    | 0.01  | 0.125          | 0.011          | 0.000       | Latitude       | 0.00    | 0.69  | 0.43           | 0.02           | 0.00     | Latitude       | 0.04     | 0.42  | 0.23           | 0.01           | 0.00     |

| Clade 10       |          |       |                |                | Aridity Index |                |          |              |                | Clade 5        |          |                |         |              |                |                |          |
|----------------|----------|-------|----------------|----------------|---------------|----------------|----------|--------------|----------------|----------------|----------|----------------|---------|--------------|----------------|----------------|----------|
| Rs Estimate    |          |       |                |                | Rs Estimate   |                |          |              |                | Rs Estimate    |          |                |         |              |                |                |          |
| clade_10       | clade_10 | pH    | Longitude(sin) | Longitude(cos) | Latitude      | clade_29       | clade_29 | AridityIndex | Longitude(sin) | Longitude(cos) | Latitude | clade_5        | clade_5 | AridityIndex | Longitude(sin) | Longitude(cos) | Latitude |
| clade_10       | 1.00     | -0.47 | 0.16           | -0.10          | -0.33         | clade_29       | 1.00     | 0.30         | 0.02           | 0.06           | 0.37     | clade_5        | 1.00    | 0.34         | 0.19           | 0.01           | 0.27     |
| pH             | -0.47    | 1.00  | -0.34          | -0.10          | -0.28         | AridityIndex   | 0.30     | 1.00         | 0.17           | 0.07           | 0.20     | AridityIndex   | 0.34    | 1.00         | 0.10           | 0.08           | 0.23     |
| Longitude(sin) | 0.16     | -0.34 | 1.00           | -0.11          | 0.17          | Longitude(sin) | 0.02     | 0.17         | 1.00           | -0.07          | 0.08     | Longitude(sin) | 0.19    | 0.10         | 1.00           | -0.07          | 0.04     |
| Longitude(cos) | 0.10     | -0.10 | -0.11          | 1.00           | -0.17         | Longitude(cos) | 0.06     | 0.07         | -0.07          | 1.00           | -0.22    | Longitude(cos) | 0.01    | 0.08         | -0.07          | 1.00           | -0.21    |
| Latitude       | -0.33    | -0.28 | 0.17           | -0.17          | 1.00          | Latitude       | 0.37     | 0.20         | 0.08           | -0.22          | 1.00     | Latitude       | 0.27    | 0.23         | 0.04           | -0.21          | 1.00     |
| p value        |          |       |                |                | p value       |                |          |              |                | p value        |          |                |         |              |                |                |          |
| clade_10       | 0.00     | 0.00  | 0.05           | 0.25           | 0.00          | clade_29       | 0.00     | 0.00         | 0.81           | 0.51           | 0.00     | clade_5        | 0.00    | 0.00         | 0.02           | 0.94           | 0.00     |
| pH             | 0.00     | 0.00  | 0.09           | 0.25           | 0.00          | AridityIndex   | 0.00     | 0.00         | 0.05           | 0.44           | 0.02     | AridityIndex   | 0.00    | 0.00         | 0.22           | 0.35           | 0.01     |
| Longitude(sin) | 0.05     | 0.09  | 0.00           | 0.21           | 0.04          | Longitude(sin) | 0.81     | 0.05         | 0.00           | 0.42           | 0.35     | Longitude(sin) | 0.02    | 0.22         | 0.00           | 0.43           | 0.67     |
| Longitude(cos) | 0.25     | 0.25  | 0.21           | 0.00           | 0.04          | Longitude(cos) | 0.51     | 0.44         | 0.42           | 0.00           | 0.01     | Longitude(cos) | 0.94    | 0.35         | 0.43           | 0.00           | 0.01     |
| Latitude       | 0.00     | 0.00  | 0.04           | 0.04           | 0.00          | Latitude       | 0.00     | 0.02         | 0.35           | 0.01           | 0.00     | Latitude       | 0.00    | 0.01         | 0.67           | 0.01           | 0.00     |

| Clade 69       |          |              |                |                | Clade 10    |                |          |              |                | Clade 31       |          |                |          |              |                |                |          |
|----------------|----------|--------------|----------------|----------------|-------------|----------------|----------|--------------|----------------|----------------|----------|----------------|----------|--------------|----------------|----------------|----------|
| Rs Estimate    |          |              |                |                | Rs Estimate |                |          |              |                | Rs Estimate    |          |                |          |              |                |                |          |
| clade_69       | clade_69 | AridityIndex | Longitude(sin) | Longitude(cos) | Latitude    | clade_10       | clade_10 | AridityIndex | Longitude(sin) | Longitude(cos) | Latitude | clade_31       | clade_31 | AridityIndex | Longitude(sin) | Longitude(cos) | Latitude |
| clade_69       | 1.00     | 0.24         | 0.18           | 0.10           | 0.13        | clade_10       | 1.00     | 0.52         | 0.20           | 0.14           | -0.44    | clade_31       | 1.00     | 0.44         | 0.06           | 0.04           | -0.32    |
| AridityIndex   | 0.24     | 1.00         | 0.13           | 0.06           | 0.31        | AridityIndex   | 0.52     | 1.00         | 0.05           | 0.00           | 0.50     | AridityIndex   | 0.44     | 1.00         | 0.14           | 0.06           | 0.44     |
| Longitude(sin) | 0.18     | 0.13         | 1.00           | -0.08          | 0.07        | Longitude(sin) | 0.20     | 0.05         | 1.00           | -0.09          | -0.17    | Longitude(sin) | 0.06     | 0.14         | 1.00           | -0.07          | 0.11     |
| Longitude(cos) | 0.10     | 0.06         | -0.08          | 1.00           | -0.23       | Longitude(cos) | 0.14     | 0.00         | -0.09          | 1.00           | -0.13    | Longitude(cos) | 0.04     | 0.06         | -0.07          | 1.00           | -0.19    |
| Latitude       | 0.13     | 0.31         | 0.07           | -0.23          | 1.00        | Latitude       | -0.44    | 0.50         | 0.17           | -0.13          | 1.00     | Latitude       | -0.32    | 0.44         | 0.11           | -0.19          | 1.00     |
| p value        |          |              |                |                | p value     |                |          |              |                | p value        |          |                |          |              |                |                |          |
| clade_69       | 0.00     | 0.00         | 0.03           | 0.25           | 0.14        | clade_10       | 0.00     | 0.00         | 0.02           | 0.10           | 0.00     | clade_31       | 0.00     | 0.00         | 0.49           | 0.60           | 0.00     |
| AridityIndex   | 0.00     | 0.00         | 0.12           | 0.48           | 0.00        | AridityIndex   | 0.00     | 0.00         | 0.58           | 1.00           | 0.00     | AridityIndex   | 0.00     | 0.00         | 0.10           | 0.50           | 0.00     |
| Longitude(sin) | 0.03     | 0.12         | 0.00           | 0.32           | 0.41        | Longitude(sin) | 0.02     | 0.58         | 0.00           | 0.27           | 0.04     | Longitude(sin) | 0.49     | 0.10         | 0.00           | 0.41           | 0.20     |
| Longitude(cos) | 0.25     | 0.48         | 0.32           | 0.00           | 0.01        | Longitude(cos) | 0.10     | 1.00         | 0.27           | 0.00           | 0.12     | Longitude(cos) | 0.60     | 0.50         | 0.41           | 0.00           | 0.02     |
| Latitude       | 0.14     | 0.00         | 0.41           | 0.01           | 0.00        | Latitude       | 0.00     | 0.00         | 0.04           | 0.12           | 0.00     | Latitude       | 0.00     | 0.00         | 0.20           | 0.02           | 0.00     |

78

79

80

81

82

83

84

85

86

87

88

89

90

91

92



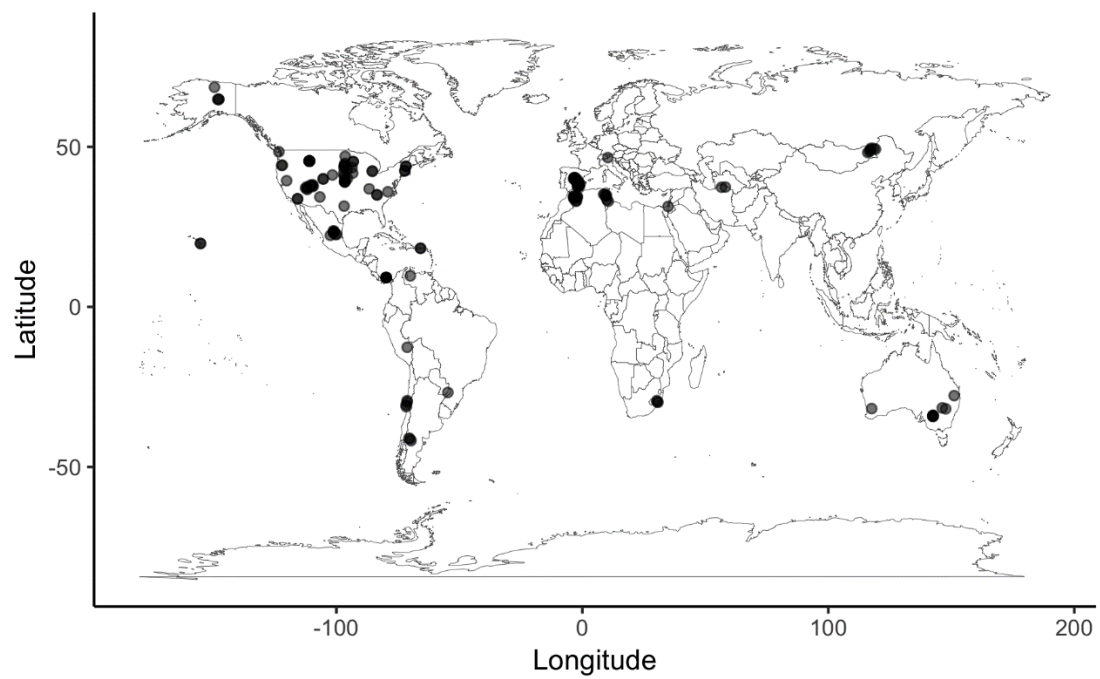

93

94 **FIGURE S1:** Map of soil sampling locations across the globe (n=143). Darker dots represent  
95 overlap of nearby sampling sites.

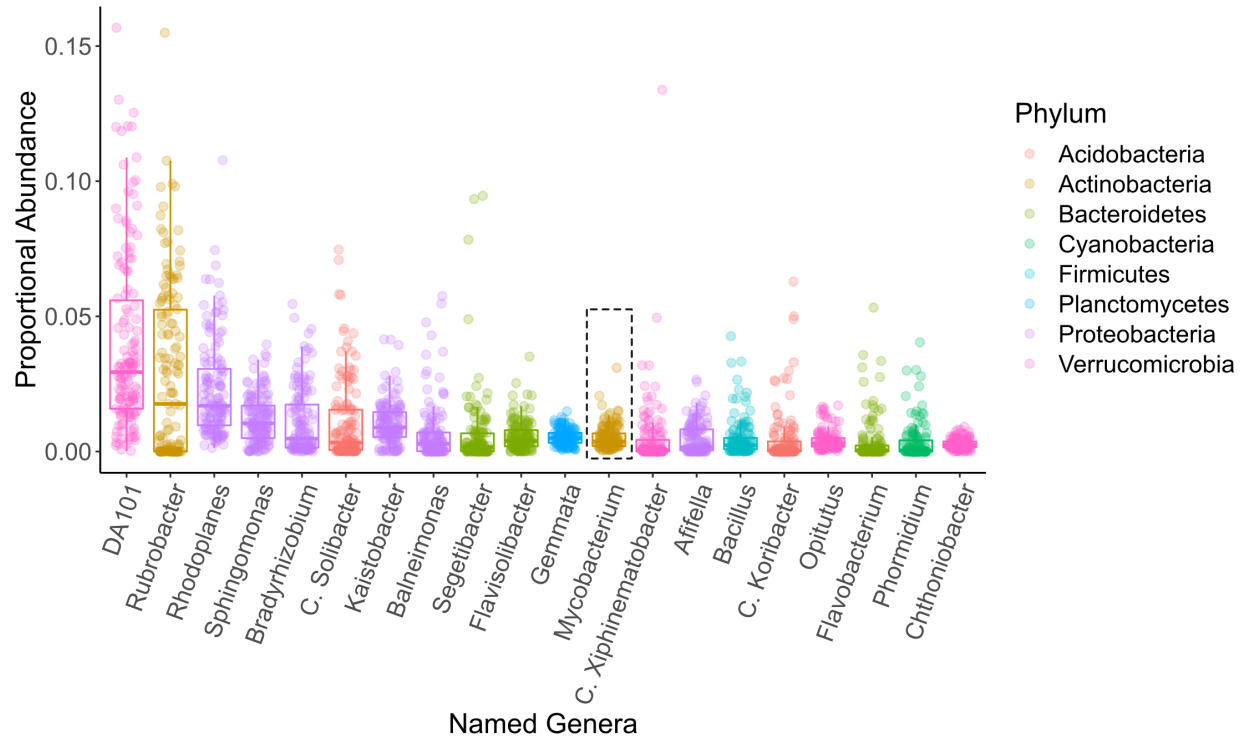

96

97

98 **Figure S2: The top twenty most abundant named genera across 143 soil samples, ordered by**

99 **average relative abundance.** Dots represent the relative abundance of each genus per

100 individual sample, as identified by 16srRNA gene sequencing. The dot color represents the

101 phylum-level classification of each genus. The relative abundance of mycobacteria ranges

102 from 0.03% to 2.9% with an average of 0.52%, making it the 12<sup>th</sup> most abundant genus on

103 average.

104

105

106
